# Supplementary material
Source: HighWire-hosted journal article supplement (https://www.jneurosci.org/highwire/filestream/601978/field_highwire_adjunct_files/0/Supplemental_Figures.pdf)
Supplement: Supplemental_Figures.pdf [file Supplemental_Figures.pdf]

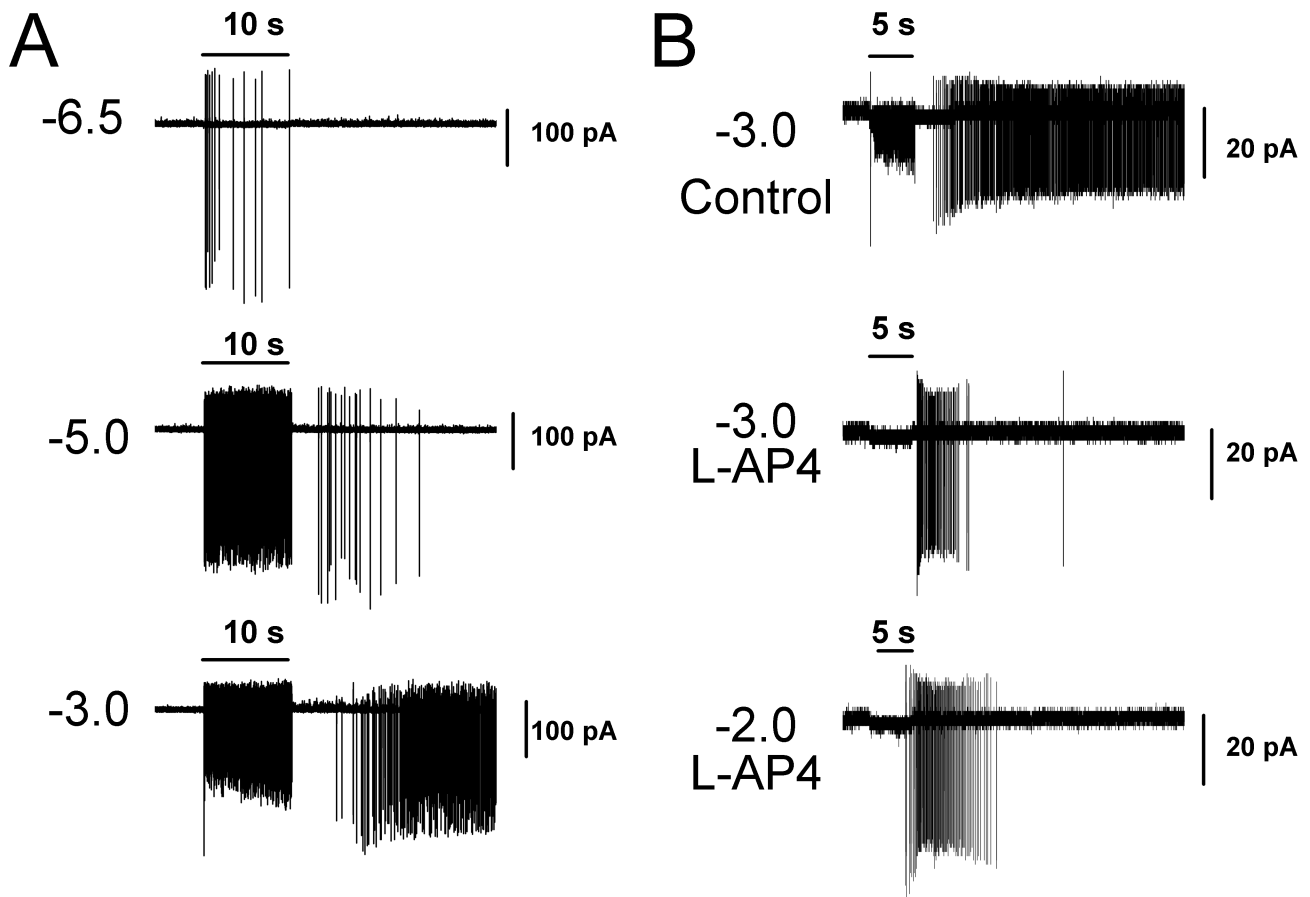

**Supplemental Figure 1. Extracellular recordings of M2 cell light responses in WT mouse.** (A) Representative loose patch recording of M2 cell response to increasing intensities of full field white light stimulation ranging from -6.5 (top panel) to -3.0 (bottom panel) LogI. (B) Cell-attached recording of single M2 cell response to white light stimulus at -3.0 LogI in control conditions (top panel) and at -3.0 LogI (middle panel) and -2.0 LogI (bottom panel) following application of L-AP4.

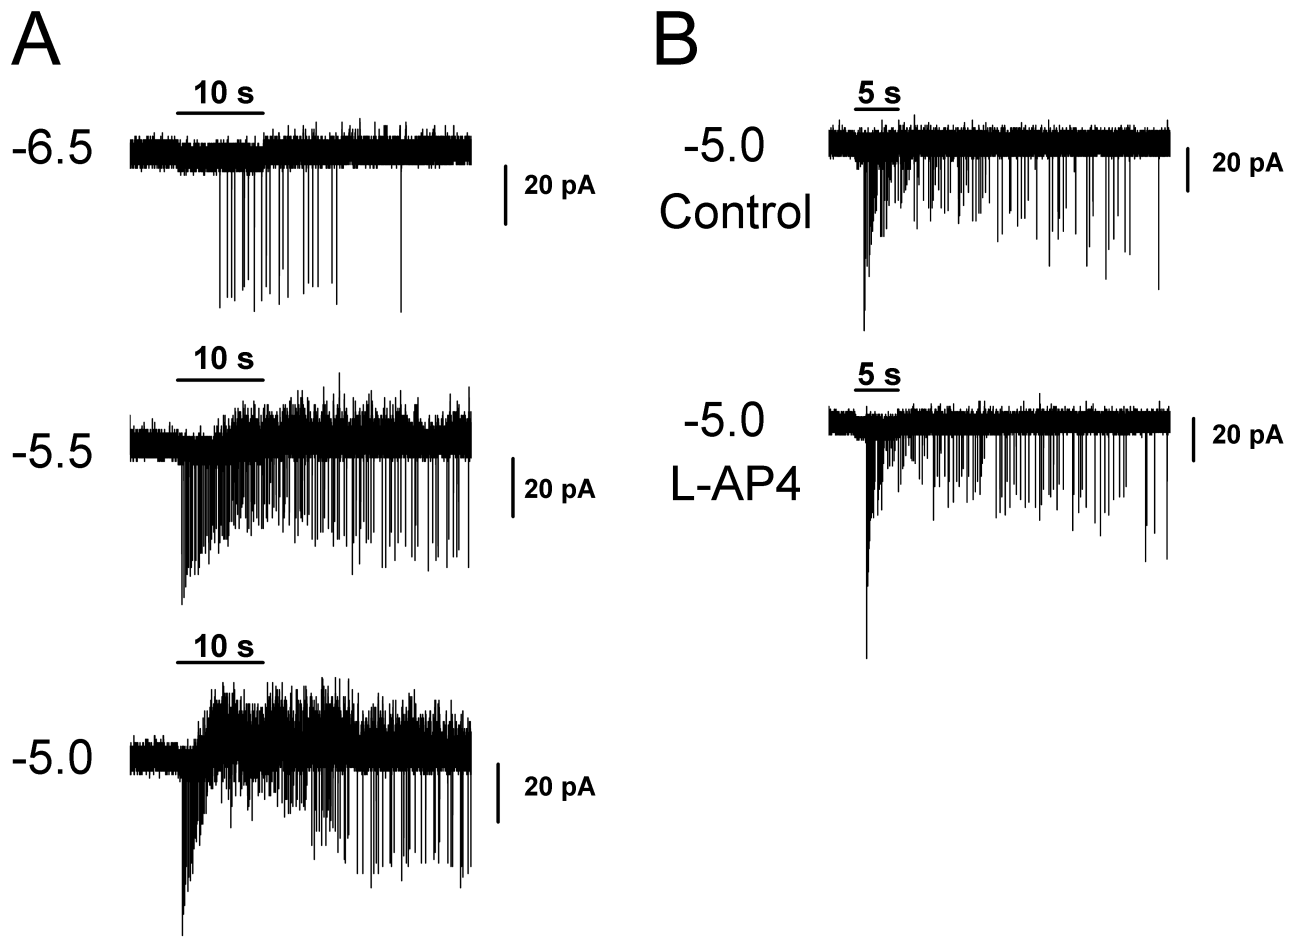

**Supplemental Figure 2. Extracellular recordings of M1 cell light responses in WT mouse.** (A) Representative loose patch recording of M1 cell response to increasing intensities of full field white light stimulation ranging from -6.5 (top panel) to -5.0 (bottom panel) LogI. (B) Loose-patch recording of single M1 cell response to white light stimulus at -5.0 LogI in control conditions (top panel) and after application of L-AP4 (bottom panel).

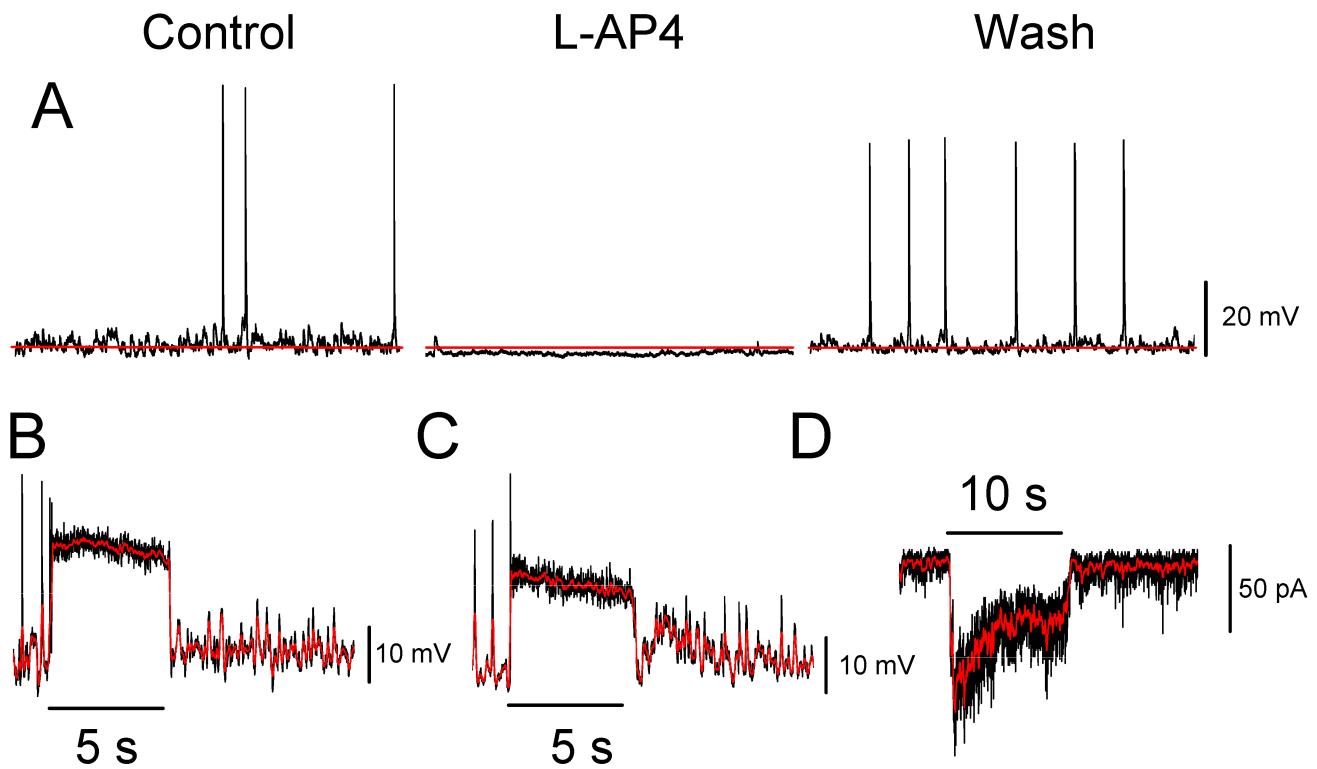

**Supplemental Figure 3. “Atypical” M1 cells are modulated by the On pathway similarly to M2 cells.** All recordings are from M1 cells in WT mice. (A) Whole-cell current clamp recording of M1 cell where  $V_m$  was recorded continuously in the absence (left panel) and presence (middle panel) of 100  $\mu\text{M}$  L-AP4. Right panel shows washout. Note the hyperpolarized  $V_m$  of the cell and the further hyperpolarization in the presence of L-AP4. (B-C) Response of 2 M1 cells in current clamp mode to 5 s white-light stimulus at intensity of  $-3\text{LogI}$  (B) and  $-2\text{LogI}$  (C) in control solution. Note the lack of continued depolarization following stimulus offset that is typical of M1 cells (see Figure 6A). (D) Voltage clamp recording of M1 light-evoked current to a 10 s, full-field, bright, white-light stimulus at  $-2\text{LogI}$ . Note fast offset kinetics and lack of persistent inward current following stimulus offset that is typically observed in M1 cells (see Figure 5A) Red line (A) indicates  $-65$  mV (B-C) 0.1 s smoothing of membrane voltage (D) 0.1 s smoothing of membrane current.  $V_m$ , resting membrane potential.
